# Supplementary material for: Do Chefs Value Health in Their Olive Oil Purchasing Decisions?
Source: MDPI journal article supplement (doi:10.3390/nu13020445), 2021-01-29
Supplement: s1 [file s1]

## Supplementary material: Survey questionnaire

### Consumption of vegetable oils

1. List the types of vegetable oils used according to the cooking method (multiple choice)

| Cooking method/Use                    | Extra virgin olive oil (EVOO) | Virgin olive oil (VOO) | Olive oil (OO) |
|---------------------------------------|-------------------------------|------------------------|----------------|
| Raw (dressing, emulsion, bread, etc.) |                               |                        |                |
| Sauté                                 |                               |                        |                |
| Frying pan                            |                               |                        |                |
| Electric fryer                        |                               |                        |                |
| Stew                                  |                               |                        |                |
| Bake                                  |                               |                        |                |
| Patisserie                            |                               |                        |                |
| Preserves/confit                      |                               |                        |                |
| Mayonnaise                            |                               |                        |                |

2. Approximately how much olive oil do you buy for your kitchen per month?

|                         | Extra virgin olive oil | Virgin olive oil | Olive oil |
|-------------------------|------------------------|------------------|-----------|
| Monthly amount (litres) |                        |                  |           |

### Selection criteria in the purchase of olive oils

3. What factors do you consider to be most important when buying extra virgin olive oil for your kitchen? (Responses not suggested, open answer, maximum of 3)

\_\_\_\_\_ Is there anything else?

\_\_\_\_\_ Is there anything else?

\_\_\_\_\_

4. What factors do you consider to be most important when buying extra virgin olive oil for your dining room? (Responses not suggested, open answer, maximum of 3)

\_\_\_\_\_ Is there anything else?

\_\_\_\_\_ Is there anything else?

\_\_\_\_\_

5. What factors do you consider to be most important when buying virgin olive oil for your kitchen? (Responses not suggested, open answer, maximum of 3)

\_\_\_\_\_ Is there anything else?

\_\_\_\_\_ Is there anything else?

\_\_\_\_\_

6. What factors do you consider to be most important when buying virgin olive oil for your dining room? (Responses not suggested, open answer, maximum of 3)

\_\_\_\_\_ Is there anything else?

\_\_\_\_\_ Is there anything else?

\_\_\_\_\_

7. What factors do you consider to be most important when buying olive oil for your kitchen? (Responses not suggested, open answer, maximum of 3)

\_\_\_\_\_ Is there anything else?

\_\_\_\_\_ Is there anything else?

\_\_\_\_\_

8. What factors do you consider to be most important when buying olive oil for your dining room? (Responses not suggested, open answer, maximum of 3)

\_\_\_\_\_ Is there anything else?

\_\_\_\_\_ Is there anything else?

\_\_\_\_\_

#### **Restaurant and interviewee descriptors**

9. Characteristics of the restaurant:

- Number of Repsol suns .....
- Number of Michelin stars .....
- Average menu price less than 30 € .....
- Average menu price more than 30 € .....

10. Description of type of cuisine (open answer):

.....  
.....  
.....

11. Age of interviewee: .....

12. Gender of interviewee:

- Male
- Female

13. Culinary training of interviewee (open answer):

.....  
.....  
.....
